# Supplementary material
Source: PubMed Central journal article supplement (PMC1876364)

Supplementary data :

**Growth curves and cell cycle analysis after AICAR treatment. (A)** Follow-up of the cellular growth after AICAR treatment of  $5 \times 10^4$  C33a cells in comparison to HeLa cells. Ordinate: number of cells ( $\times 10^5$ ), abscissa: different concentrations of AICAR. **(B)** Representative flow cytometric profiles of C33a cells after incubation with AICAR. The percentage of cells present in the different phases of the cell cycle (G1, S, G2/M) are given in the table below and represent the mean of two different experiments.

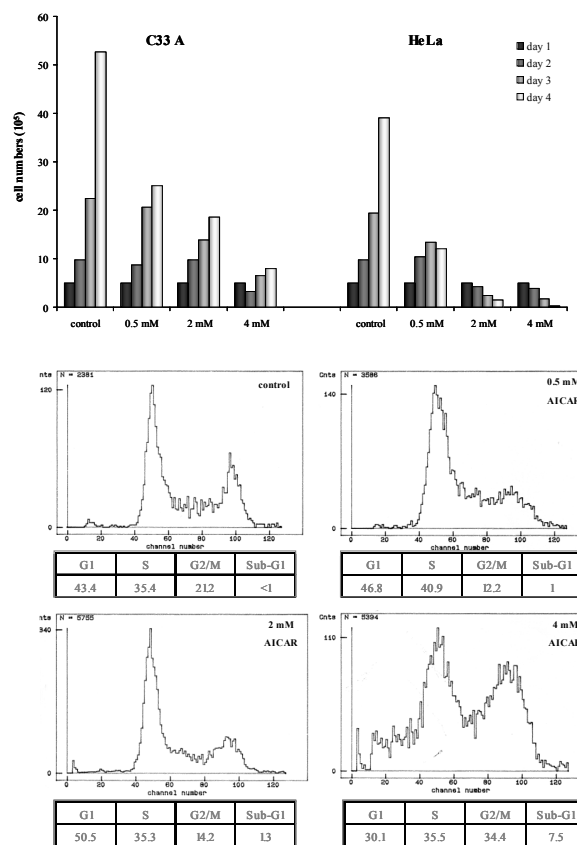

Supplement: bj4030501add.pdf [file bj4030501add.pdf]
